# Supplementary material for: An architectured TiO2 nanosheet with discrete integrated nanocrystalline subunits and its application in lithium batteries
Source: Royal Society of Chemistry journal article supplement (doi:10.1039/c2jm33085g), 2012-01-01
Supplement: c2jm33085g.pdf [file c2jm33085g.pdf]

Supporting Information for

**Architected TiO<sub>2</sub> Nanosheet with Discrete Integrated  
Nanocrystalline Subunits and Its Application in Lithium Batteries**

Long Ren <sup>1</sup>, Yundan Liu <sup>1</sup>, Xiang Qi <sup>1,\*</sup>, K. S. Hui <sup>2</sup>, K. N. Hui <sup>3</sup>, Zongyu Huang <sup>1</sup>, Jun  
Li <sup>1</sup>, Kai Huang <sup>1</sup>, Jianxin Zhong <sup>1</sup>

<sup>1</sup> *Laboratory for Quantum Engineering and Micro-Nano Energy Technology and  
Faculty of Materials and Optoelectronic Physics, Xiangtan University, Hunan 411105,  
P. R. China*

<sup>2</sup> *Department of Systems Engineering and  
Engineering Management, City University of Hong Kong, Hong Kong, China*

<sup>3</sup> *School of Materials Science and Engineering, Pusan National University, 30  
Jangjeon-Dong, Kumjeong-Gu, Busan 609-735, Republic of Korea*

\* Corresponding author: Faculty of Materials and Optoelectronic Physics, Xiangtan University,

Hunan 411105, P. R. China

E-mail address: [xqi@xtu.edu.cn](mailto:xqi@xtu.edu.cn) (X. Qi)

## Addition Figures

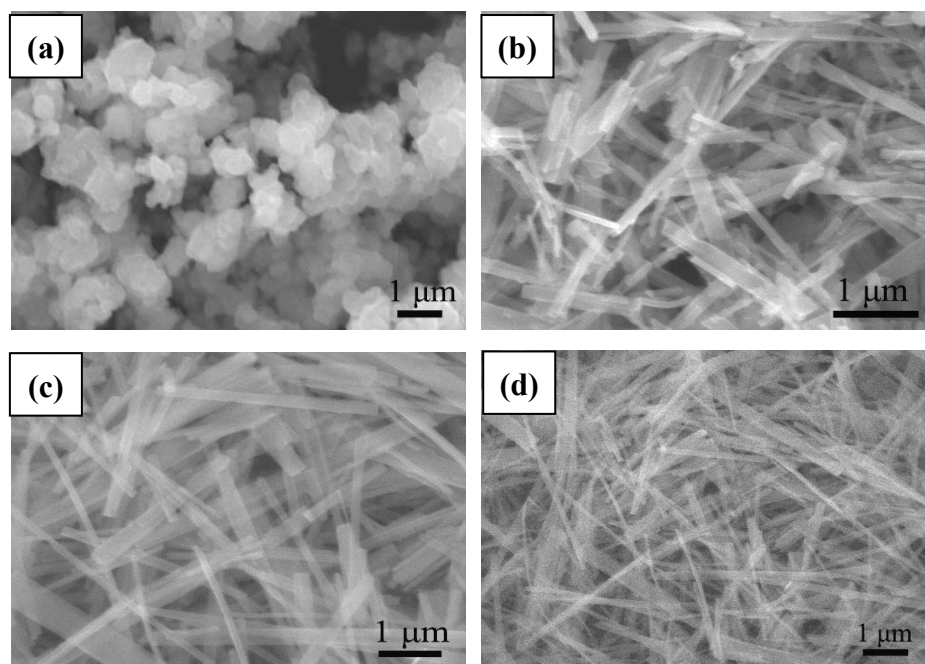

Figure S1. SEM images of (a) raw anatase TiO<sub>2</sub> particles and the synthesized (b) hydrogen titanate nanosheets, (c) uniform anatase TiO<sub>2</sub> nanosheets, (d) architected anatase TiO<sub>2</sub> nanosheets.
